# Supplementary material for: Steric hindrance-induced selective growth of rhodium on gold nanobipyramids for plasmon-enhanced nitrogen fixation
Source: Royal Society of Chemistry journal article supplement (doi:10.1039/d3sc00081h), 2023-01-01
Supplement: d3sc00081h1.pdf [file d3sc00081h1.pdf]

## Electronic supporting information

# **Steric Hindrance-Induced Selective Growth of Rhodium on Gold Nanobipyramids for Plasmon-Enhanced Nitrogen Fixation**

Henglei Jia,<sup>a,‡</sup> Fan Li,<sup>a,‡</sup> Yuanyuan Yang<sup>a</sup>, Mengxuan Zhao<sup>a</sup>, Jingzhao Li<sup>a</sup> and Chun-yang Zhang<sup>\*,a,b</sup>

<sup>a</sup> College of Chemistry, Chemical Engineering and Materials Science, Shandong Normal University, Jinan 250014, China

<sup>b</sup> School of Chemistry and Chemical Engineering, Southeast University, Nanjing 211189, China.

\* Corresponding author. E-mail: cyzhang@sdu.edu.cn

‡ These authors contributed equally to this work.

## Supporting Experimental Section

**Chemicals.** Sodium borohydride ( $\text{NaBH}_4$ , 99%), hexadecyltrimethylammonium bromide (CTAB, for molecular biology,  $\geq 99.0\%$ ), benzyldimethylhexadecylammonium chloride (16-BAC, cationic detergent), silver nitrate ( $\text{AgNO}_3$ ,  $\geq 99.0\%$ ), L-ascorbic acid (AA,  $\geq 99.0\%$ ), sodium citrate tribasic dihydrate (TSC,  $\geq 99.0\%$ ), sodium hydroxide ( $\text{NaOH}$ ,  $\geq 97.0\%$ , pellets), sodium iodide ( $\text{NaI}$ ,  $\geq 99.5\%$ ) and methanol ( $\text{CH}_3\text{OH}$ , for HPLC,  $\geq 99.9\%$ ) were purchased from Sigma-Aldrich. Tetrachloroauric (III) acid tetrahydrate ( $\text{HAuCl}_4 \cdot 4\text{H}_2\text{O}$ ), hydrochloric acid ( $\text{HCl}$ ,  $\sim 36.0\text{--}38.0\text{ wt}\%$ ), ammonia solution ( $\text{NH}_3 \cdot \text{H}_2\text{O}$ ,  $\sim 25.0\text{--}28.0\text{ wt}\%$ ), and hydrogen peroxide ( $\text{H}_2\text{O}_2$ ,  $\geq 30.0\text{ wt}\%$ ) were obtained from Sinopharm Chemical Reagent. Rhodium (III) chloride trihydrate ( $\text{RhCl}_3 \cdot 3\text{H}_2\text{O}$ , 98.0%), hexadecyltrimethylammonium chloride (CTAC, 97%), ammonium chloride ( $\text{NH}_4\text{Cl}$ , PT), salicylic acid ( $\text{C}_6\text{H}_4(\text{OH})\text{COOH}$ ,  $\geq 99.0\%$ ), and sodium hypochlorite solution ( $\text{NaClO}$ , available chlorine  $\geq 5.0\%$ ) were purchased from Aladdin Reagent. Sodium nitroferrocyanide (III) dihydrate ( $\text{Na}_2[\text{Fe}(\text{CN})_5\text{NO}] \cdot 2\text{H}_2\text{O}$ , 99%) was obtained from Macklin. Nitrogen ( $^{14}\text{N}_2$ , 99.999%), nitrogen ( $^{15}\text{N}_2$ , 98 atom%  $^{15}\text{N}$ ) and argon ( $\text{Ar}$ , 99.999%) was used as received. Deionized (DI) water with a resistivity of  $18.2\text{ M}\Omega\text{-cm}$  was used in all procedures.

**Growth of the Au NBPs.** The Au NBP sample for Rh overgrowth was prepared using a seed-mediated growth method, as described in previous works.<sup>1</sup> Specifically, the seed solution was made by adding a freshly prepared, ice-cold  $\text{NaBH}_4$  solution (0.01 M, 125  $\mu\text{L}$ ) into a mixture solution of  $\text{HAuCl}_4$  (0.01 M, 125  $\mu\text{L}$ ), TSC (0.01 M, 250  $\mu\text{L}$ ), and DI water (9.625 mL) under vigorous stirring. The resultant seed solution was kept undisturbed in an oven set at  $30\text{ }^\circ\text{C}$  for at least 2 h. The seed solution (200  $\mu\text{L}$ ) was then added into a growth solution that was prepared by mixing CTAB (0.1 M, 40 mL),  $\text{HAuCl}_4$  (0.01 M, 2 mL),  $\text{AgNO}_3$  (0.01 M, 400  $\mu\text{L}$ ),  $\text{HCl}$  (1 M, 800  $\mu\text{L}$ ), and AA (0.1 M, 320  $\mu\text{L}$ ) in advance, followed by gentle inversion mixing for 10 s. The resultant solution was kept undisturbed in an oven set at  $30\text{ }^\circ\text{C}$  overnight. The as-obtain Au NBPs were further purified through a depletion-force-induced purification process.

**Growth of the Au NBP/tip-Rh NDs.** The as-grown Au NBPs (optical density (OD) at the major plasmon peak pre-adjusted to 3.0, 5 mL) were centrifugated once and redispersed into DI water (500  $\mu$ L) for further use. For the selective growth of Rh nanocrystals on two tips of Au NBPs, 16-BAC (0.01 M, 70  $\mu$ L),  $\text{RhCl}_3$  (0.01 M, 200  $\mu$ L), Au NBPs (500  $\mu$ L), NaI (1 mM, 20  $\mu$ L) and AA (0.1 M, 200  $\mu$ L) were sequentially added into DI water (9.01 mL) in a scintillation vial (20 mL) under magnetic stirring. The overall volume of the mixture solution was 10 mL and the final concentration of 16-BAC was 70  $\mu$ M. The resultant solution was placed in an oven set at 95  $^\circ\text{C}$  for 1 h. The color of the solution was changed from red to gray after the growth process.

**Growth of the Au NBP@Rh core@shell nanostructures.** The preparation of Au NBP@Rh core@shell nanostructures was similar to that of dumbbell-shaped nanostructures except that the final concentration of 16-BAC was adjusted to 10  $\mu$ M and the amount of NaI was increased to 100  $\mu$ L. The overall volume was adjusted to 10 mL using DI water.

**Growth of the Rh nanocrystals.** The preparation of Rh nanocrystals was similar to that of dumbbell-shaped nanostructures except that Au NBP sample (0.5 mL) was replace with DI water (0.5 mL).

**Photocatalytic  $\text{N}_2$  fixation.** The  $\text{N}_2$  photofixation experiments were conducted in a home-made photocatalytic reactor with three ends, of which two side ends were used for gas inlet and outlet and one middle end (diameter = 3 cm) was equipped with a quartz window for light illumination. Take dumbbell-shaped nanostructures as an example, the catalyst (0.26 mg) was washed with water to remove excess surfactant and was redispersed into DI water (8 mL). To close the photocatalytic cycle,  $\text{CH}_3\text{OH}$  (2 mL) was used as the hole scavenger. Pior to each experiment, high-purity  $\text{N}_2$  (20 mL  $\text{min}^{-1}$ ) was pumped into the reaction solution at a pressure of 1 atm for 30 min under gentle stirring. A continuous Xe lamp (CEL-HXF300) was employed as the light source for the illumination and two filters (CEL-AM1.5G and CEL-JB420) were equipped on the Xe lamp to supply a visible–near-infrared (NIR) light ( $\lambda > 420$  nm, 400  $\text{mW cm}^{-2}$ ). The reaction solution temperature was kept at 25  $^\circ\text{C}$  using a water-circulation cooling system. The  $\text{N}_2$  photofixation experiment was conducted for 2 h and a

small amount of reaction solution (0.75 mL) was taken out for each 30 min. The production of NH<sub>3</sub> was quantitatively detected with the indophenol-blue method.<sup>2,3</sup>

**Density functional theory calculation.** The DFT calculations were carried out using the projector augmented plane-wave method, as implemented in the Vienna *ab initio* simulation package (VASP).<sup>4</sup> The exchange-correlation potential was described by the generalized gradient approximation (GGA) with the Perdew–Burke–Ernzerhof (PBE) formulation.<sup>5</sup> The cut-off energy of plane wave and the convergence criterion in iterative solution of the Kohn-Sham equation were set to 450 eV and 10<sup>-5</sup> eV, respectively. The Brillouin zone was sampled with 2 × 2 × 1 k-mesh, and a vacuum layer of 20 Å was added along z direction. During geometry optimization, all atoms of the structure were relaxed. The change of Gibbs free energy ( $\Delta G$ ) on the Au/Rh catalyst surface was calculated according to equation 1.

$$\Delta G = \Delta E + \Delta E_{\text{ZPE}} - T\Delta S \quad (1)$$

where  $\Delta E$ ,  $\Delta E_{\text{ZPE}}$ , and  $\Delta S$  are the changes of electronic energy, zero-point energy, and entropy, respectively. T is set as the room temperature (T = 298.15 K).

**Characterization.** Transmission electron microscopy (TEM) imaging was performed on an HT7700 electron microscope operated at 100 kV. The aberration-corrected high-resolution TEM (HRTEM) imaging, high-angle annular dark-field scanning transmission electron microscopy (HAADF-STEM) imaging, and energy-dispersive X-ray (EDX) elemental mapping were conducted on an FEI Titan Themis G2 microscope operated at 300 kV. The extinction spectra were measured on a Hitachi U-3900 ultraviolet/visible/NIR spectrophotometer. X-ray diffraction (XRD) patterns were acquired on a Smart Lab Se diffractometer equipped with Cu K $\alpha$  radiation. X-ray photoelectron spectroscopy (XPS) spectra were measured on a Thermo Scientific ESCALAB 250Xi spectrometer equipped with an Al K $\alpha$  X-ray source (h $\nu$  = 1486.6 eV). Inductively coupled plasma optical emission spectroscopy (ICP-OES) was conducted on a PerkinElmer Optima 7300 DV system.

## Supplementary Figures

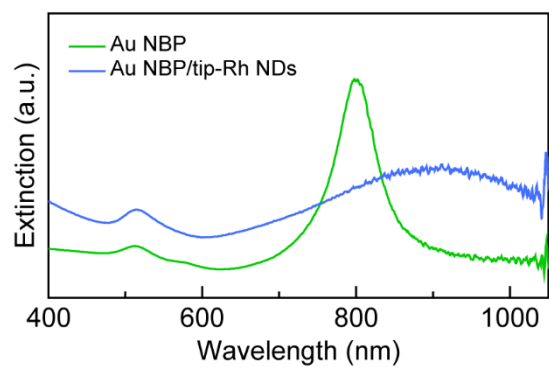

**Fig. S1** Extinction spectra of the Au NBPs before (green) and after (blue) the selective growth of Rh nanocrystals.

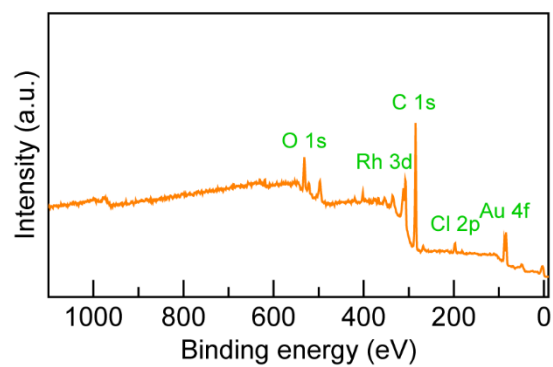

**Fig. S2** XPS survey spectrum of the Au NBP/tip-Rh NDs.

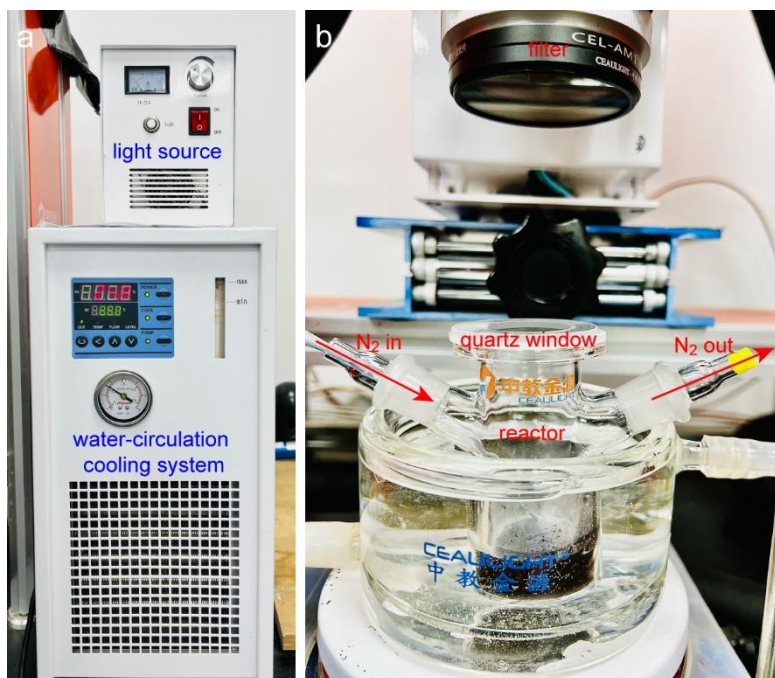

**Fig. S3** Photographs of the photocatalytic system for N<sub>2</sub> photofixation. (a) Light source and water-circulation cooling system. (b) Photocatalytic reaction devices.

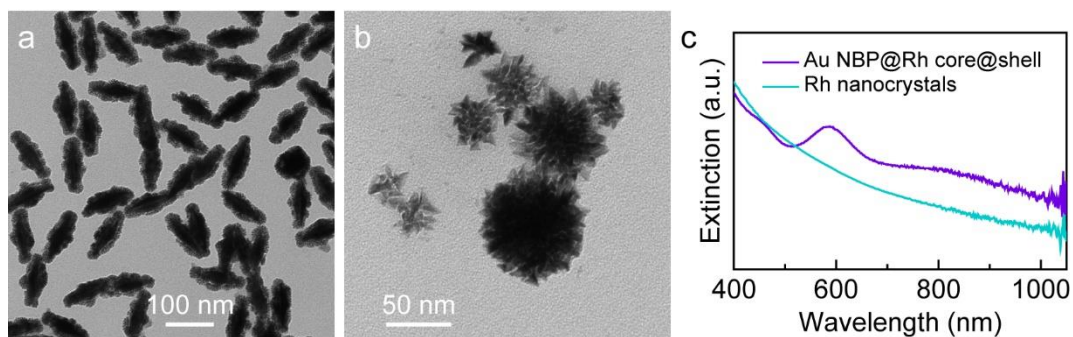

**Fig. S4** (a) TEM image of the Au NBP@Rh core@shell nanostructures. (b) TEM image of the Rh nanocrystals. (c) Extinction spectra of the Au NBP@Rh core@shell nanostructures and Rh nanocrystals.

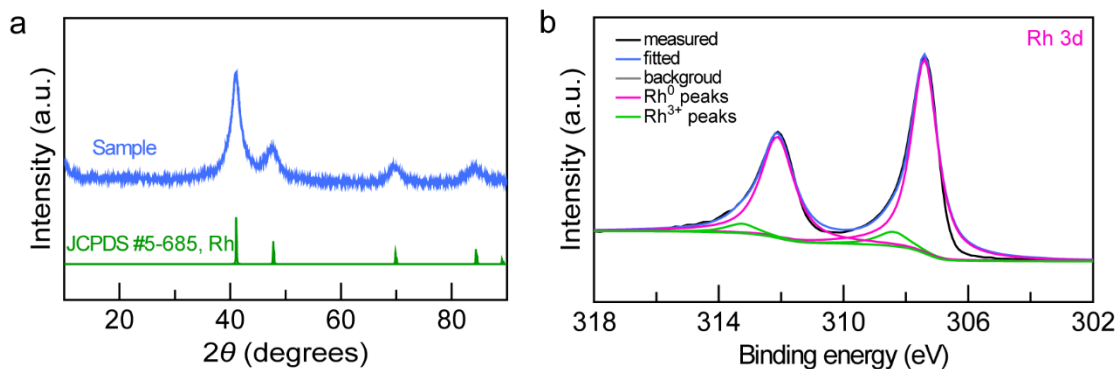

**Fig. S5** (a) XRD patterns of the Rh nanocrystals. The green curve is the standard powder diffraction patterns of the face-centered-cubic structure of Rh (space group,  $Fm-3m$ ; lattice constant, 0.38031 nm). (b) High-resolution Rh 3d XPS spectra of the Rh nanocrystals.

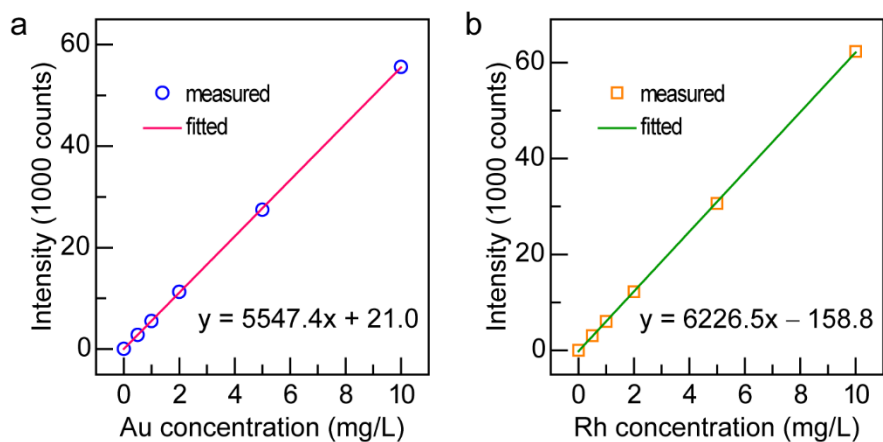

**Fig. S6** Linear calibration relationships between the emission intensity and the atomic mass concentration for Au and Rh in the ICP-OES measurements. (a) For Au. The coefficient of determination for the linear fitting is  $R^2 = 0.99993$ . (b) For Rh. The coefficient of determination for the linear fitting is  $R^2 = 0.99991$ .

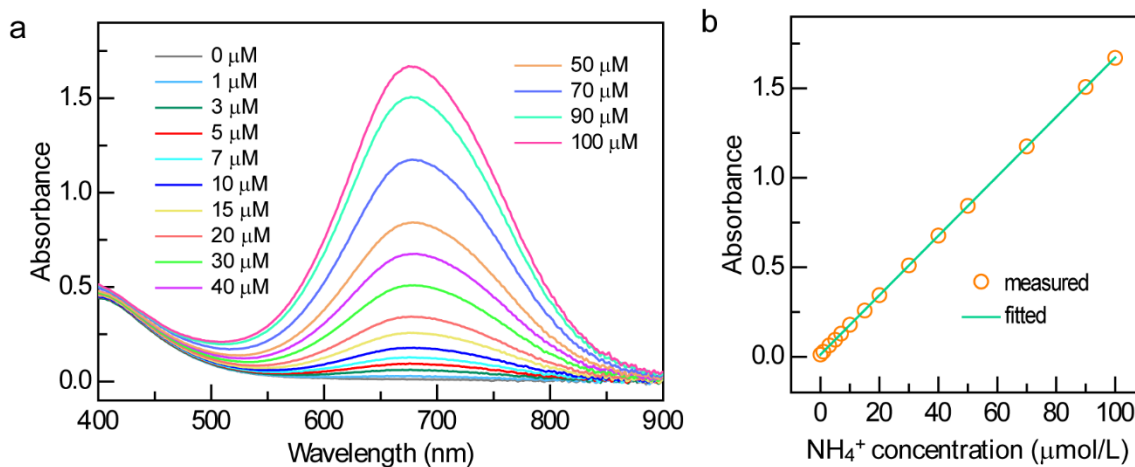

**Fig. S7** (a) Absorption spectra of the standard  $\text{NH}_4\text{Cl}$  solutions with different concentrations. (b) Linear relationship between the absorbance values and concentrations of the standard  $\text{NH}_4\text{Cl}$  solutions. The coefficient of determination for the linear fitting is  $R^2 = 0.99999$ .

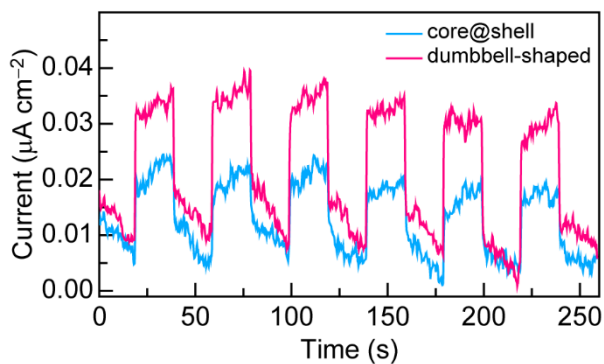

**Fig. S8** Time-dependent photocurrent of the core@shell and dumbbell-shaped Au/Rh nanostructures measured at the open-circuit potential under visible–NIR light illumination.



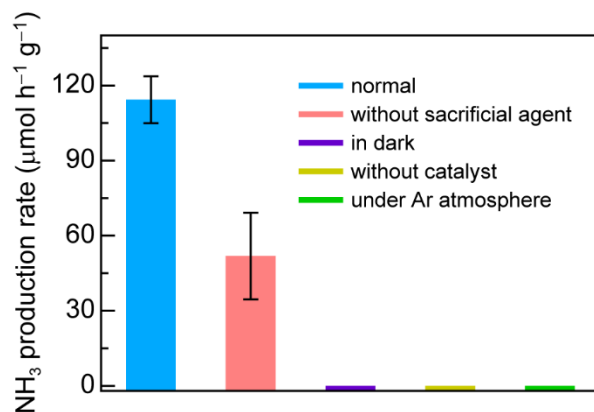

**Fig. S9** Control experiments of the N<sub>2</sub> photofixation under different conditions.

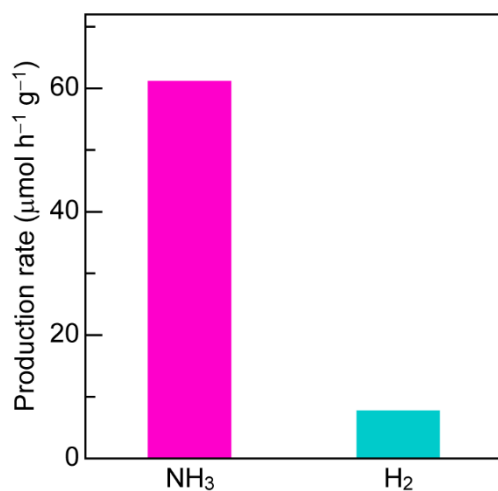

**Fig. S10** Competition between NH<sub>3</sub> synthesis and H<sub>2</sub> evolution on the Au NBP/tip-Rh NDs. The photocatalytic reaction was conducted in a gastight glass reactor (65 mL). Specifically, the Au NBP/tip-Rh ND sample (0.26 mg) was added into a mixture solution of DI water (16 mL) and CH<sub>3</sub>OH (4 mL). Prior to the illumination, the resultant solution was purged with Ar gas and then bubbled with N<sub>2</sub> gas (20 mL min<sup>-1</sup>) for 1h. The reactor was sealed and the product generation rates were determined after 2-h light illumination ( $\lambda > 420$  nm, 400 mW cm<sup>-2</sup>).

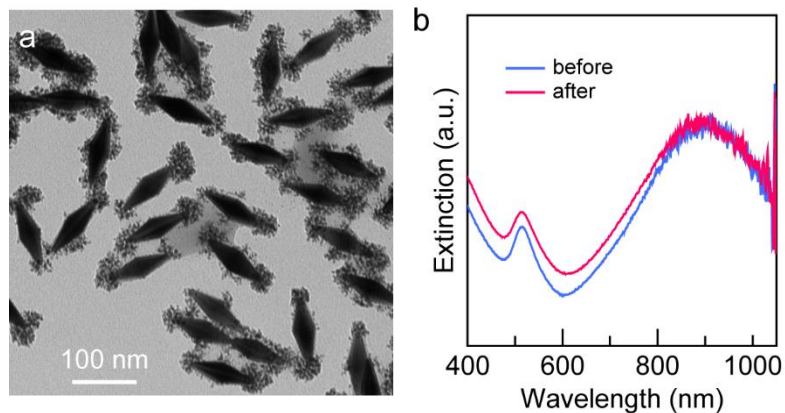

**Fig. S11** (a) TEM image of the Au NBP/tip-Rh NDs after the photocatalytic reaction. (b) Extinction spectra of the Au NBP/tip-Rh NDs before (blue) and after (red) the photocatalytic reaction.

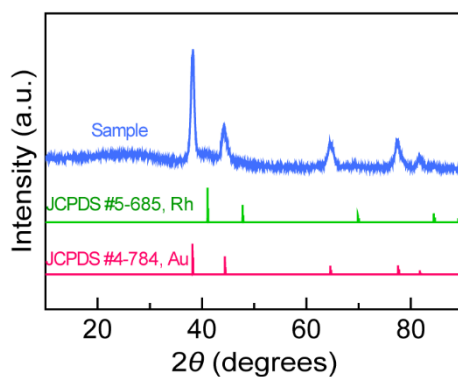

**Fig. S12** XRD patterns of the Au NBP/tip-Rh NDs after the photocatalytic reaction. The red and green curves are the standard powder diffraction patterns of the face-centered-cubic structure of Au (space group,  $Fm-3m$ ; lattice constant, 0.40786 nm) and the face-centered-cubic structure of Rh (space group,  $Fm-3m$ ; lattice constant, 0.38031 nm).

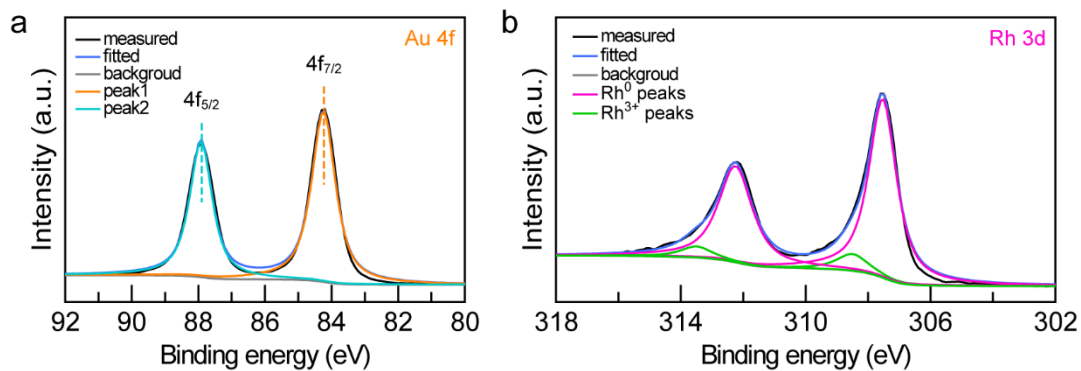

**Fig. S13** (a, b) High-resolution Au 4f (a) and Rh 3d (b) XPS spectra of the Au NBP/tip-Rh NDs after the photocatalytic reaction.

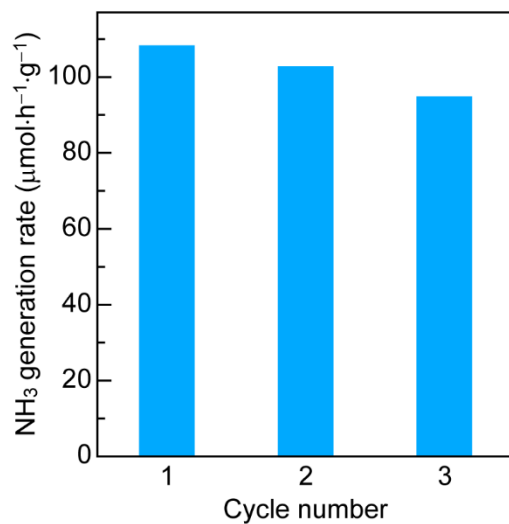

**Fig. S14** N<sub>2</sub> photofixation activities of three successive cycles with the Au NBP/tip-Rh NDs as the catalyst.

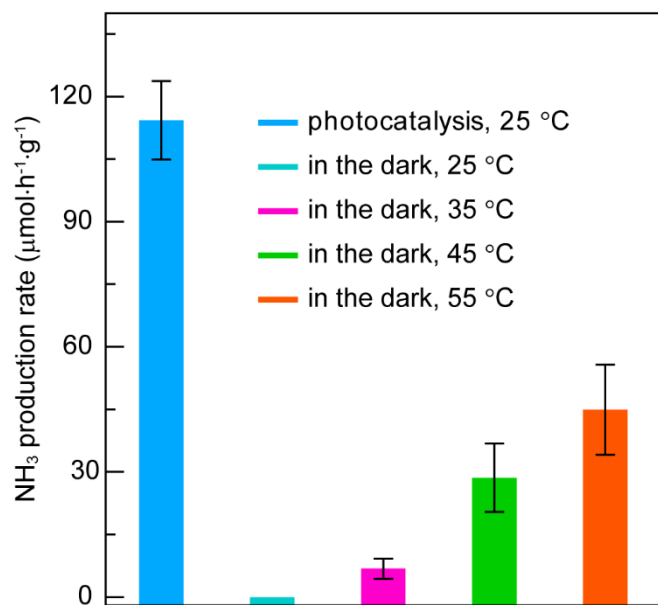

**Fig. S15** Comparison of the catalytic activities performed under light illumination and in different-temperature water baths in the dark.

## Supplementary Figure

**Table S1.** The weights of the different catalysts used for the N<sub>2</sub> photofixation.

| catalyst                                    | mass of Au (mg) | mass of Rh (mg) | Total mass (mg) |
|---------------------------------------------|-----------------|-----------------|-----------------|
| Au NBP/tip-Rh NDs                           | 0.17            | 0.09            | 0.26            |
| Au NBP@Rh core@shell nanostructures         | 0.20            | 0.17            | 0.37            |
| Au NBPs                                     | 0.52            | 0.00            | 0.52            |
| Rh nanocrystals                             | 0.00            | 0.50            | 0.50            |
| the mixture of Au NBPs with Rh nanocrystals | 0.27            | 0.16            | 0.43            |

## References

1. Q. Li, X. L. Zhuo, S. Li, Q. F. Ruan, Q.-H. Xu and J. F. Wang, *Adv. Opt. Mater.*, 2015, **3**, 801–812.
2. J. H. Yang, Y. Z. Guo, R. B. Jiang, F. Qin, H. Zhang, W. Z. Lu, J. F. Wang and J. C. Yu, *J. Am. Chem. Soc.*, 2018, **140**, 8497–8508.
3. H. L. Jia, A. X. Du, H. Zhang, J. H. Yang, R. B. Jiang, J. F. Wang and C.-y. Zhang, *J. Am. Chem. Soc.*, 2019, **141**, 5083–5086.
4. G. Kresse and D. Joubert, *Phys. Rev. B*, 1999, **59**, 1758–1775.
5. J. P. Perdew, K. Burke and M. Ernzerhof, *Phys. Rev. Lett.*, 1996, **77**, 3865–3868.
